# Supplementary material for: Gremlin-1 Promotes Metastasis of Breast Cancer Cells by Activating STAT3-MMP13 Signaling Pathway
Source: PubMed Central journal article supplement (PMC7730512; doi:10.3390/ijms21239227), 2020-12-03
Supplement: ijms-21-09227-s001.pdf [file ijms-21-09227-s001.pdf]

Supplementary Figure Legends

**A**

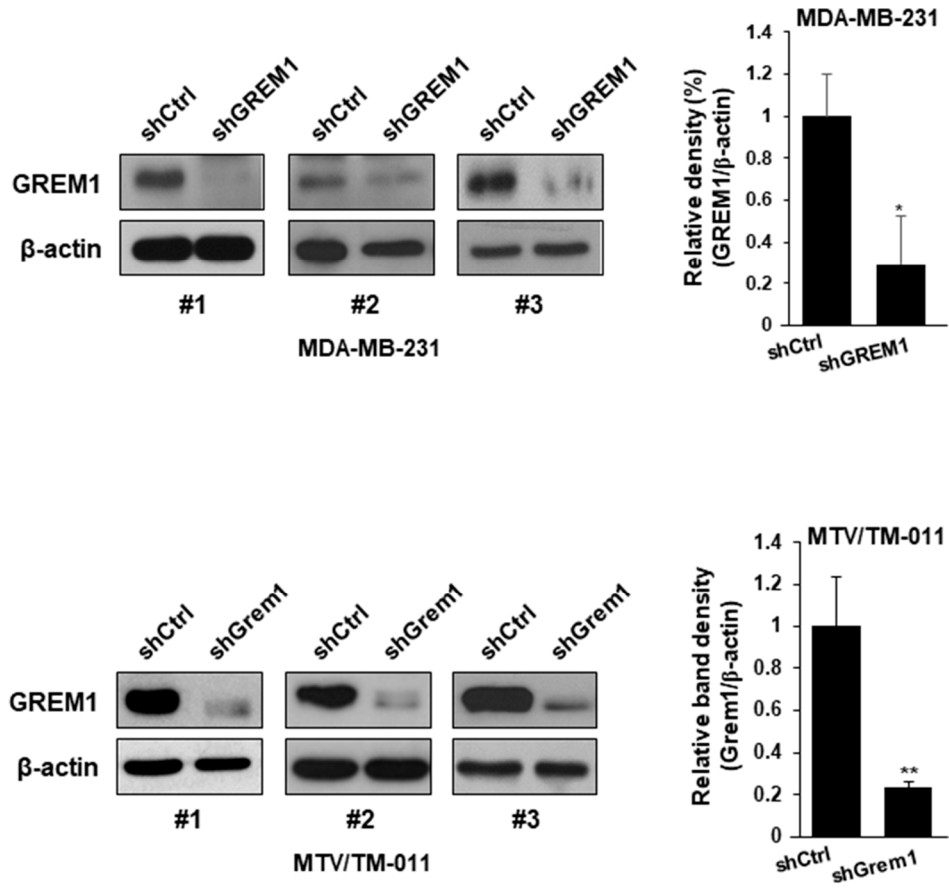

**B**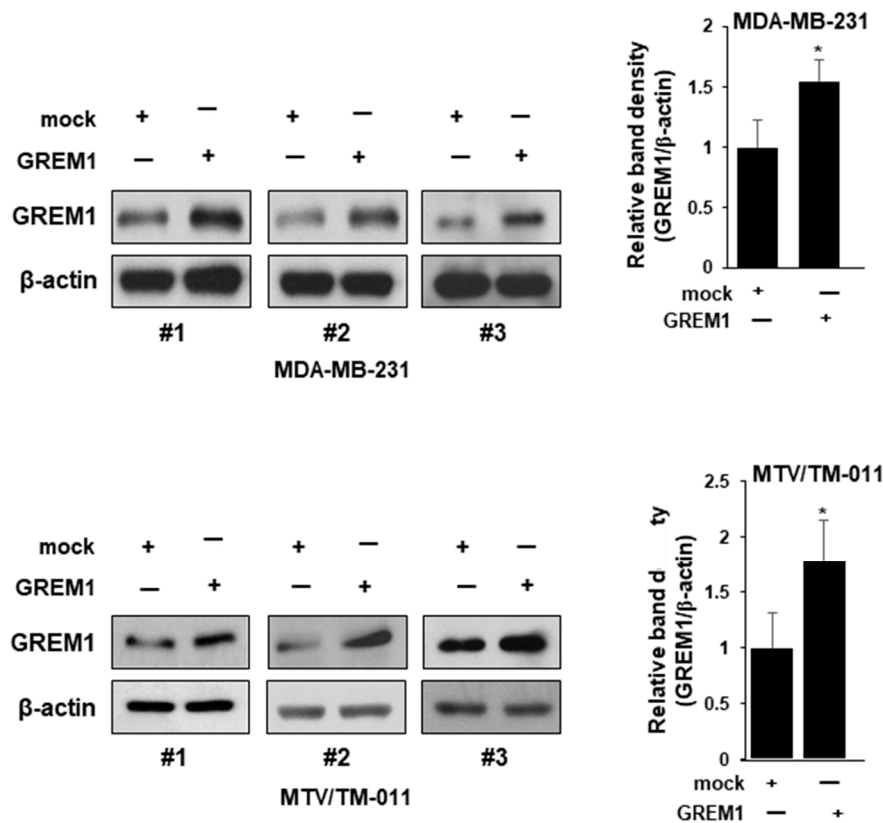

**Supplementary Fig. 1. The expression of GREM1 was verified in each indicated cell line. (A)** The cell lysates of MDA-MB-231 and MTV/TM-011 cell lines stably expressing shCtrl or shGREM1 were immunoblotted with GREM1 antibody. **(B)** MDA-MB-231 and MTV/TM-011 cells were transfected with each plasmid expressing mock or GREM1 for 48 h and the lysates were immunoblotted with GREM1 antibody. All quantitative values were obtained using three sets of independently separated samples on different days. Data are presented as the mean  $\pm$  SD of three independent experiments. Two-sided t test. \*,  $p < 0.05$ ; \*\*,  $p < 0.01$ .

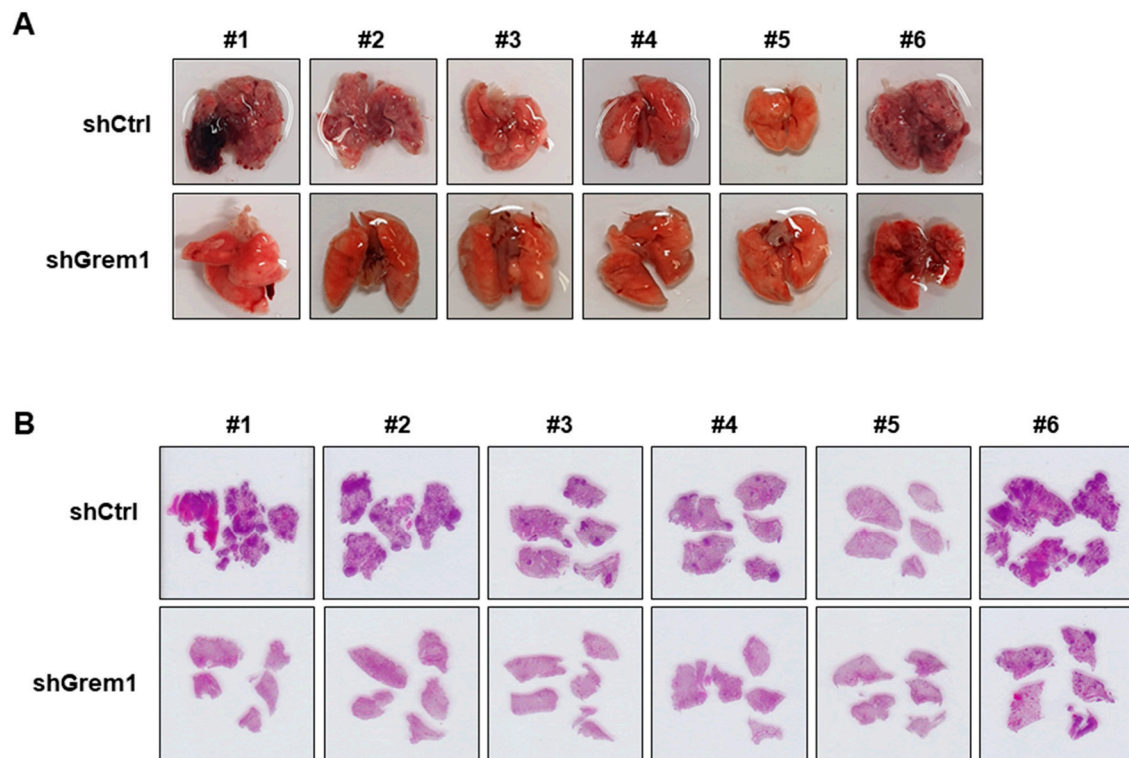

**Supplementary Fig. 2. GREM1 knockdown suppressed lung metastasis of breast cancer cells. (A)** Images of lung metastasis nodules formed by the injection of MTV/TM-011 cells expressing shCtrl or shGrem1 into the mouse mammary fat pads (n = 6/ each group). **(B)** Whole lung tissues were stained by H&E (n = 6/ each group).

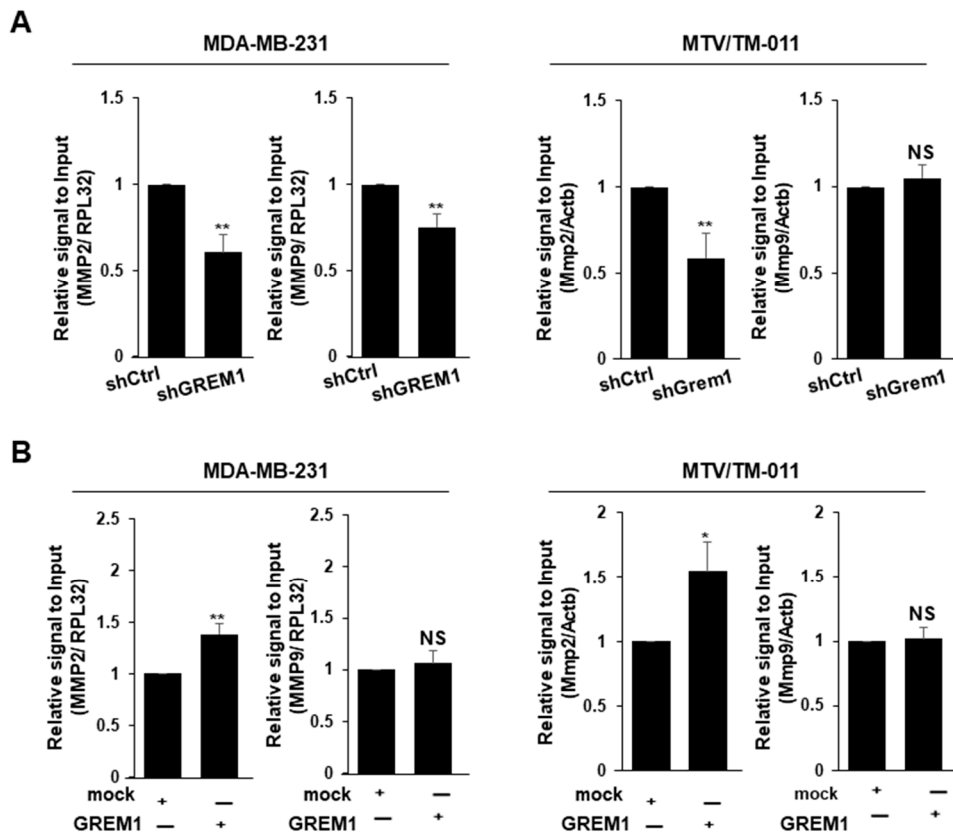

**Supplementary Fig. 3. GREM1 regulated the expression of MMP2 or MMP9. (A)** Relative mRNA levels of *MMP2* and *MMP9* in GREM1-depleted breast cancer cells. **(B)** Relative mRNA levels of *MMP2* and *MMP9* in GREM1-overexpressing breast cancer cells. MDA-MB-231 and MTV/TM-011 cells were transfected with each indicated plasmid for 48 h, and mRNA levels of genes were quantitated by qPCR analysis. Data are presented as the mean  $\pm$  SD of three independent experiments. Two-sided t test. \*,  $p < 0.05$ ; \*\*,  $p < 0.01$ ; NS, not significant.

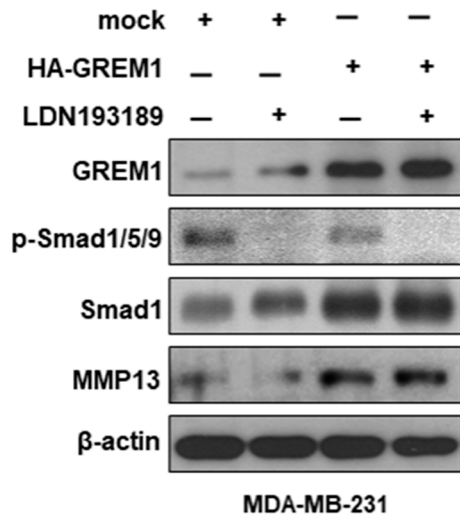

**Supplementary Fig. 4. The expression of MMP13, which was increased by GREM1, was not affected by treatment of LDN193189, a BMP pathway inhibitor.** MDA-MB-231 cells were transfected with each plasmid expressing mock or GREM1 for 24 h and then incubated in the absence or presence of LDN193189 (1  $\mu$ M) for another 24 h. The protein lysates were immunoblotted with each indicated antibody.

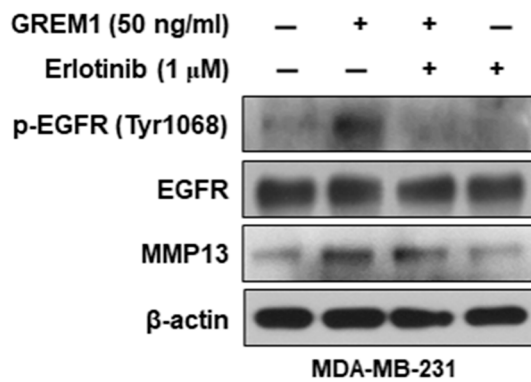

**Supplementary Fig. 5. The expression of MMP13, which was increased by GREM1, was not reduced by treatment of erlotinib, an EGFR tyrosine kinase inhibitor.** MDA-MB-231 cells were pretreated with erlotinib (1  $\mu$ M) for 24 h and then incubated with GREM1 (50 ng/ml) for another 30 min (pEGFR and EGFR) or 48 h (MMP13). The protein lysates were subjected to immunoblot analysis.

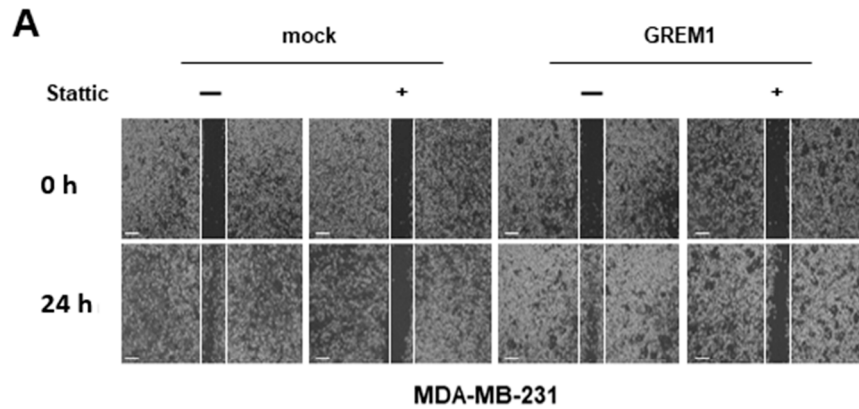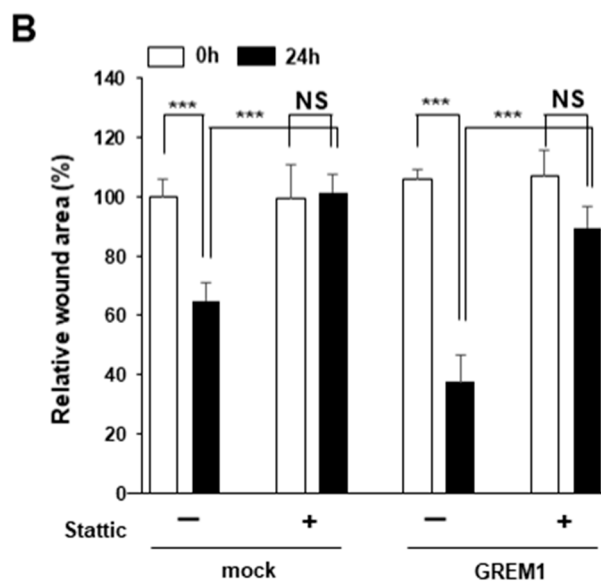

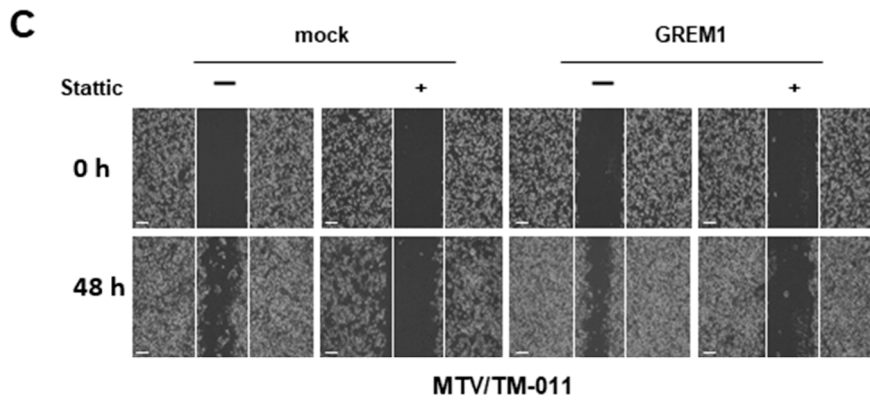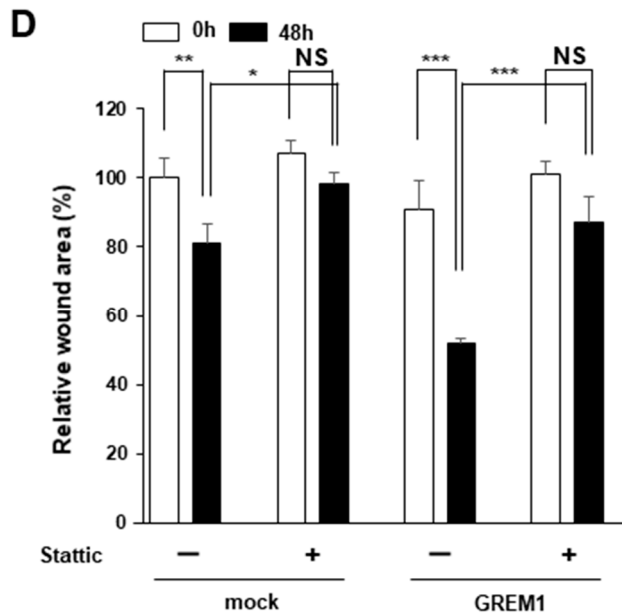

**Supplementary Fig. 6. The enhanced migratory capacity of GREM1-overexpressing cells was inhibited by Static treatment. (A-D)** MDA-MB-231 and MTV/TM-011 cells were transiently transfected with plasmid overexpressing mock or GREM1 for 48 h and seeded again in culture-inserts with medium containing Static (5  $\mu$ M). Images of wound sites were captured at 0 h (control) and the indicated time periods of incubation using an inverted microscope (4 x magnification). Scale bar = 200  $\mu$ m. Each wound area was determined using Image J software. Data are presented using triplicate wells per group and statistical significance was determined by one-way ANOVA. \*,  $p < 0.05$ ; \*\*,  $p < 0.01$ ; \*\*\*,  $p < 0.001$ ; NS, not significant.

**Supplementary Table 1. qRT-PCR primer sequences**

| <b>Primers (Human)</b> | <b>Forward</b>         | <b>Reverse</b>         |
|------------------------|------------------------|------------------------|
| GREM1                  | TCATCAACCGCTTCTGTTACG  | GGCTGTAGTTCAGGGCAGTT   |
| MMP2                   | GATACCCCTTTGACGGTAAGGA | CCTTCTCCCAAGGTCCATAGC  |
| MMP3                   | CGGTTCCGCCTGTCTCAAG    | CGCCAAAAGTGCCTGTCTT    |
| MMP9                   | AGACCTGGGCAGATTCCAAAC  | CGGCAAGTCTTCCGAGTAGT   |
| MMP11                  | GGGTGTACGACGGTGAAAAG   | GTGGAAACGCCAGTAGTCCC   |
| MMP13                  | CCAGACTTCACGATGGCATTG  | GGCATCTCCTCCATAATTTGGC |
| MMP19                  | GCAATGTGGCTCCCTTGAC    | TCAGTCCAGAACTCGTCTTCG  |
| RPL32                  | TTAAGCGTAACTGGCGGAAAC  | AAACATTGTGAGCGATCTCGG  |

| <b>Primers (Mouse)</b> | <b>Forward</b>          | <b>Reverse</b>         |
|------------------------|-------------------------|------------------------|
| Grem1                  | GGGACCCTACTGCCAACAG     | TTTGCACCAATCTCGCTTCAG  |
| Mmp2                   | ACCTGAACACTTTCTATGGCTG  | CTTCCGCATGGTCTCGATG    |
| Mmp3                   | TTAAAGACAGGCACTTTTGGCG  | CCCTCGTATAGCCCAGAACT   |
| Mmp9                   | CTGGACAGCCAGACACTAAAG   | CTCGCGGCAAGTCTTCAGAG   |
| Mmp11                  | CCGGAGAGTCACCGTCATC     | GCAGGACTAGGGACCCAATG   |
| Mmp13                  | CTTCTTCTTGTTGAGCTGGACTC | CTGTGGAGGTCACTGTAGACT  |
| Mmp19                  | CTGTGGCTGGCATTCTTACTT   | GGGCAGTCCAGATGCTTCC    |
| Actb                   | GGCTGTATTCCCCTCCATCG    | CCAGTTGGTAACAATGCCATGT |
